# Supplementary material for: Transcriptome analysis of transcription factors and enzymes involved in monoterpenoid biosynthesis in different chemotypes of Mentha haplocalyx Briq
Source: PeerJ journal article supplement (doi:10.7717/peerj.14914), 2023-02-20

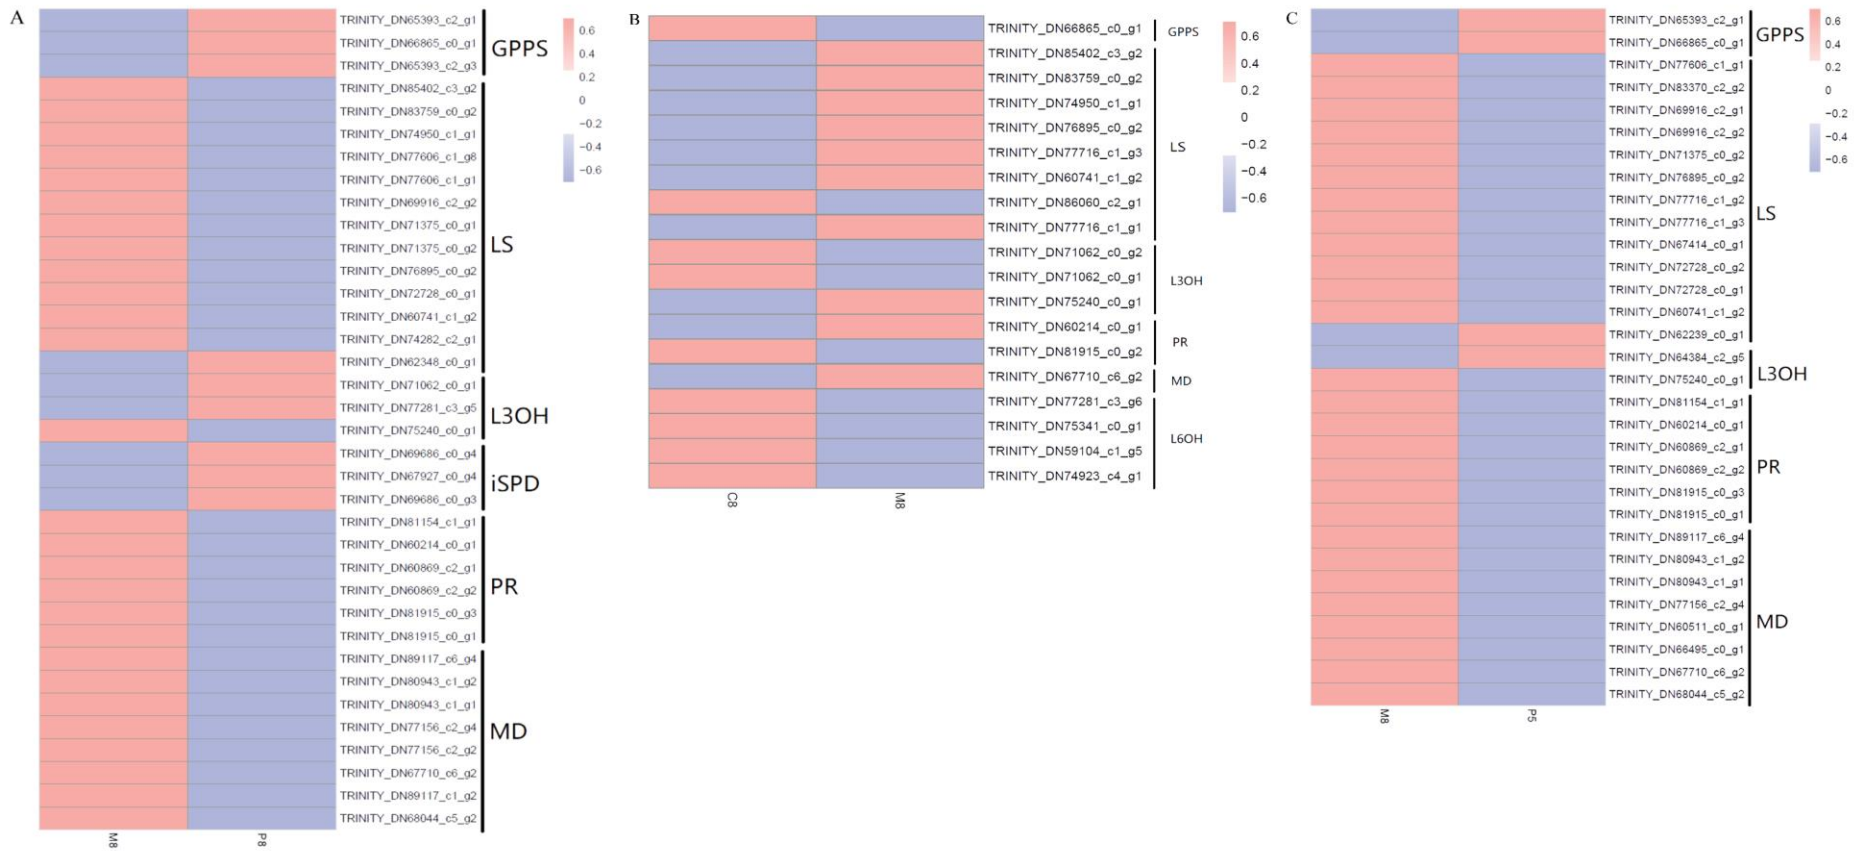

Supplement: Figure_S4.pdf [file Figure_S4.pdf]
